# Supplementary material for: Current Research and Development of Chemotherapeutic Agents for Melanoma
Source: Cancers (Basel). 2010 Apr 9;2(2):397–419. doi: 10.3390/cancers2020397 (PMC3835084; doi:10.3390/cancers2020397)
Supplement: Correction — (PDF, 65 KB) [file cancers-02-00397-s001.pdf]

Supplementary file

## Shyur *et al.* Current Research and Development of Chemotherapeutic Agents for Melanoma

Lie-Fen Shyur

Agricultural Biotechnology Research Center, Academia Sinica, Taipei 115, Taiwan;

E-Mail: lfshyur@ccvax.sinica.edu.tw

---

We found a mistake at the affiliation in our paper published in *Cancers* [1]. The correct affiliation is as below.

Kyaw Minn Hsan<sup>1,2,†</sup>, Chun-Chieh Chen<sup>1,2,†</sup>, and Lie-Fen Shyur<sup>2,\*</sup>

<sup>1</sup> Institute of Plant Biology, National Taiwan University, Taipei 106, Taiwan;

<sup>2</sup> Agricultural Biotechnology Research Center, Academia Sinica, Taipei 115, Taiwan;

E-Mail: robin@gate.sinica.edu.tw (K.M.H.); maraca@gate.sinica.edu.tw (C.C.C.)

<sup>†</sup> Both authors contributed equally to this article.

\* Author to whom correspondence should be addressed; E-Mail: lfshyur@ccvax.sinica.edu.tw; Tel.: +886-2-26515028.

### Reference

1. Hsan, K.M.; Chen, C.-C.; Shyur, L.-F. Current Research and Development of Chemotherapeutic Agents for Melanoma. *Cancers* **2010**, *2*, 397–419.

© 2010 by the authors; licensee MDPI, Basel, Switzerland. This article is an open access article distributed under the terms and conditions of the Creative Commons Attribution license (<http://creativecommons.org/licenses/by/3.0/>).
